# Supplementary material for: Luminescent detection of the lipopolysaccharide endotoxin and rapid discrimination of bacterial pathogens using cationic platinum(ii) complexes
Source: Royal Society of Chemistry journal article supplement (doi:10.1039/c7ra03312e), 2017-01-01
Supplement: c7ra03312e1.pdf [file c7ra03312e1.pdf]

### Supporting Information for

Luminescent detection of lipopolysaccharide endotoxin and rapid discrimination of bacterial pathogens by cationic platinum(II) complexes

Yiwen Zhu,<sup>a,b,c</sup> Chen Xu,<sup>a,b,c</sup> Yu Wang,<sup>a,b,c</sup> Yaqing Chen,<sup>d</sup> Xiaokang Ding,<sup>a,b,c\*</sup> and

Bingran Yu<sup>a,b,c\*</sup>

- a. State Key Laboratory of Chemical Resource Engineering, Beijing University of Chemical Technology, Beijing 100029 China.
- b. Key Laboratory of Carbon Fiber and Functional Polymers (Beijing University of Chemical Technology), Ministry of Education, Beijing 100029 China.
- c. Beijing Laboratory of Biomedical Materials, Beijing Advanced Innovation Center for Soft Matter Science and Engineering, Beijing University of Chemical Technology, Beijing 100029 China.
- d. Affiliated Hospital of Hebei University, Baoding 071000 China

\*Corresponding authors. Tel.: 8610-64421243

E-mail address: yubr@mail.buct.edu.cn (B.Y.); dingxk@mail.buct.edu.cn (X.D.)

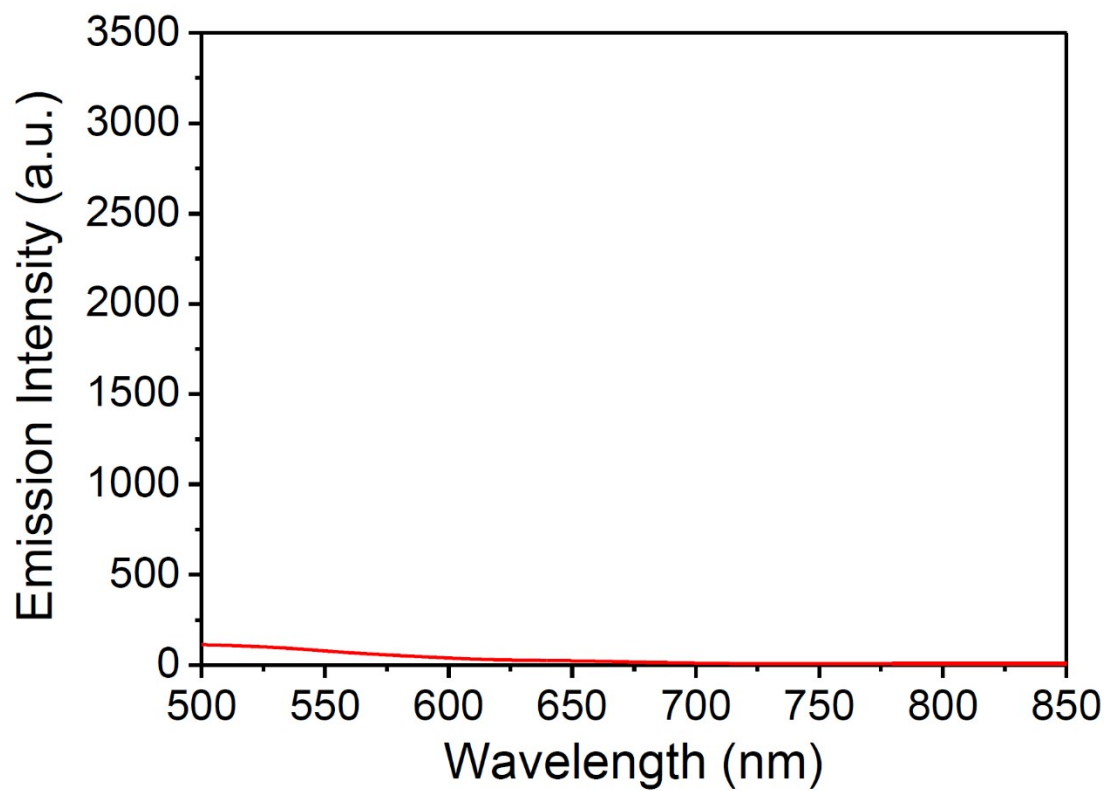

**Fig. S1** The fluorescence emission spectrum of LPS (6.65 μM) without addition of chloroplatinum(II) complex  $[\text{Pt}(\text{N}^{\wedge}\text{N}^{\wedge}\text{N})\text{Cl}]^+$ .
